# Supplementary material
Source: PubMed Central journal article supplement (PMC2840857)
Supplement: jc.2009-1822_1.pdf [file jc.2009-1822_1.pdf]

## 455 Supplemental Table 1. Prescription medication use reported by group

456 **Young Women**

457 Thyroid hormone replacement - 1

458 Oral contraceptive-2

459

460 **Young Men**

461 None

462 **Elderly Women**

463 Thiazide diuretic - 2

464 Bisphosphonate - 2

465 Thyroid hormone replacement - 2

466 Angiotensin converting enzyme-inhibitor - 2

467 Statin-2

468 Estrogen-1

469

470 **Elderly Men**

471 Calcium channel blocker - 1

472 Statin - 2

473 Proton pump inhibitor - 1

474 Central nervous system stimulant (methylphenidate) - 1

475

476 Supplemental Table 2. Amino acid concentrations ( $\mu\text{mol/L}$ ) over time by age and treatment.

|     |        | Young (n = 12) |             |                         | Elderly (n = 12) |             |                         | Young vs. Elderly           |
|-----|--------|----------------|-------------|-------------------------|------------------|-------------|-------------------------|-----------------------------|
|     |        | Baseline       | Final       | $P_{\text{Treat*Time}}$ | Baseline         | Final       | $P_{\text{Treat*Time}}$ | $P_{\text{Treat*Time*Age}}$ |
| GLU | Saline | 70 (12)        | 58 (12)↓    | 0.610                   | 92 (12)          | 89 (14)     | 0.033                   | 0.074                       |
|     | BCAA   | 76 (17)        | 67 (22)     |                         | 114 (17)         | 99 (17)↓↓   |                         |                             |
| SER | Saline | 102(9)         | 98 (8)      | 0.031                   | 83 (7)           | 91 (6)      | < 0.001                 | 0.083                       |
|     | BCAA   | 96 (7)         | 76 (5) ↓↓   |                         | 93 (7)           | 69 (5) ↓↓   |                         |                             |
| GLN | Saline | 625 (53)       | 643 (44)    | 0.038                   | 595 (54)         | 647 (49)    | 0.987                   | 0.148                       |
|     | BCAA   | 600 (44)       | 704 (48) ↑  |                         | 598 (56)         | 650 (70)    |                         |                             |
| HIS | Saline | 78 (4)         | 78 (5)      | 0.119                   | 74 (2)           | 77 (2)      | < 0.001                 | 0.024                       |
|     | BCAA   | 77 (5)         | 71 (4)      |                         | 81 (2)           | 66 (3) ↓↓   |                         |                             |
| GLY | Saline | 205 (20)       | 200 (17)    | < 0.001                 | 197 (21)         | 206 (23)    | < 0.001                 | 0.145                       |
|     | BCAA   | 196 (14)       | 130 (8) ↓↓  |                         | 214 (18)         | 123 (8) ↓↓  |                         |                             |
| THR | Saline | 144 (16)       | 118 (14) ↓↓ | < 0.001                 | 125 (8)          | 106 (6) ↓↓  | < 0.001                 | 0.297                       |
|     | BCAA   | 139 (12)       | 72 (7) ↓↓   |                         | 128 (7)          | 55 (5) ↓↓   |                         |                             |
| ALA | Saline | 297 (15)       | 254 (15)    | 0.044                   | 340 (32)         | 253 (20) ↓  | 0.604                   | 0.111                       |
|     | BCAA   | 297 (18)       | 310 (21)    |                         | 365 (36)         | 260 (18) ↓↓ |                         |                             |
| ARG | Saline | 118 (11)       | 106 (8)     | 0.354                   | 106 (11)         | 111 (9)     | 0.054                   | 0.037                       |
|     | BCAA   | 111 (10)       | 109 (7)     |                         | 128 (10)         | 111 (10)    |                         |                             |
| TYR | Saline | 51 (9)         | 48 (4)      | < 0.001                 | 59 (6)           | 61 (5)      | < 0.001                 | 0.051                       |
|     | BCAA   | 49 (5)         | 19 (2) ↓↓   |                         | 64 (5)           | 27 (3) ↓↓   |                         |                             |
| MET | Saline | 28 (3)         | 25 (3)      | 0.007                   | 23 (4)           | 24 (2)      | < 0.001                 | 0.031                       |
|     | BCAA   | 26 (2)         | 17 (3) ↓↓   |                         | 29 (2)           | 11 (4) ↓↓   |                         |                             |
| PHE | Saline | 44 (4)         | 54 (4) ↑    | <0.001                  | 45 (4)           | 65 (4) ↑    | < 0.001                 | 0.119                       |
|     | BCAA   | 44 (4)         | 33 (3) ↓↓   |                         | 52 (4)           | 42 (3) ↓↓   |                         |                             |
| LYS | Saline | 175 (10)       | 172 (11)    | <0.001                  | 150 (22)         | 167 (21)    | 0.004                   | 0.087                       |
|     | BCAA   | 160 (12)       | 118 (9) ↓↓  |                         | 185 (23)         | 113 (20) ↓↓ |                         |                             |

477 <sup>1</sup> P value between curves of BCAA and Saline.478 <sup>2</sup> P value for the BCAA effect between young and elderly participants.

479 ↓ Significant reduction in amino acid concentration (P value &lt; 0.05)

480 ↓↓ Significant reduction in amino acid concentration (P value &lt; 0.01)

481 ↑ Significant increase in amino acid concentration (P value &lt; 0.05)
